1 **Enhanced post-traumatic headache-like behaviors and diminished**  
2 **contribution of peripheral CGRP in female rats following a mild**  
3 **closed head injury**

4  
5 Dara Bree<sup>1</sup>, Kimberly Mackenzie<sup>3</sup>, Jennifer Stratton<sup>3</sup>, Dan Levy<sup>1,2</sup>

6  
7  
8  
9 <sup>1</sup> Dept. of Anesthesia, Critical Care and Pain Medicine, Beth Israel Deaconess Medical Centre, <sup>2</sup>  
10 Harvard Medical School, 330 Brookline Ave, Boston, MA, USA 02215; email: dbree@gmail.com;  
11 Tel: 617-667-5034; Fax: none

12  
13 <sup>3</sup> Teva Biologics, Redwood City, CA, USA; email: Jennifer.Stratton@tevapharm.com; Tel: 650-  
14 421-5372

15  
16 <sup>3</sup> Teva Biologics, Redwood City, CA, USA; email: Kimberly.Mackenzie01@tevapharm.com;  
17 Tel: 650-569-2785

18  
19  
20 <sup>1</sup> Dept. of Anesthesia, Critical Care and Pain Medicine, Beth Israel Deaconess Medical Centre, <sup>2</sup>  
21 Harvard Medical School, 330 Brookline Ave, Boston, MA, USA 02215; email:  
22 [dlevy1@bidmc.harvard.edu](mailto:dlevy1@bidmc.harvard.edu); Tel: 617-667-5034

23  
24  
25 Number of text pages: 28; Number of figures: 7

26  
27  
28 **\*Corresponding author:** Dr. Dan Levy, Dept. of Anesthesia, Critical Care and Pain Medicine,  
29 Beth Israel Deaconess Medical Centre, 330 Brookline Ave, Boston, MA, USA 02215; email:  
30 [dlevy1@bidmc.harvard.edu](mailto:dlevy1@bidmc.harvard.edu); Tel: 617-667-5034; Fax: none.

31

32

33

34

35

## 1 **Abstract**

2 **Introduction:** Females are thought to have increased risk of developing posttraumatic headache  
3 (PTH) following a traumatic head injury, or concussion. However, the processes underlying this  
4 susceptibility remain unclear. We previously explored the development of PTH-like pain  
5 behaviors in a novel rat model of mild closed head injury, along with the ability of sumatriptan  
6 and an anti-calcitonin-gene-related peptide monoclonal antibody to ameliorate these behaviors.  
7 Here, we explored the development of PTH-like behaviors and the effectiveness of these headache  
8 therapies in females subjected to the same head trauma protocol.

9  
10 **Methods:** Adult female Sprague Dawley rats were subjected to a mild closed head injury using a  
11 weight-drop device. Characterization of headache and pain related behaviors included  
12 assessment of changes in cutaneous cephalic and extracephalic tactile pain sensitivity, using von  
13 Frey monofilaments. Sensitivity to headache/migraine triggers was tested by examining the  
14 effect of systemic administration of a low-dose of glyceryl trinitrate (GTN). Treatments included  
15 acute systemic administration of sumatriptan and repeated systemic administration of a mouse  
16 anti-calcitonin-gene-related peptide monoclonal antibody. Serum levels of calcitonin-gene-  
17 related peptide were measured at various time points in females and males after the head injury.

18  
19 **Results:** Female rats subjected to a mild closed head injury developed cutaneous mechanical  
20 hyperalgesia, that was limited to the cephalic region, and was resolved 4 weeks later. Cephalic  
21 pain hypersensitivity was ameliorated by treatment with sumatriptan, but was resistant to an  
22 early and prolonged treatment with the anti-CGRP monoclonal antibody. Following the  
23 resolution of the head injury-evoked cephalic hypersensitivity, administration of GTN produced

1 a renewed and pronounced cephalic and extracephalic pain hypersensitivity that was inhibited by  
2 sumatriptan, but only partially by the anti-CGRP treatment. CGRP serum levels were elevated in  
3 females but not in males at 7 days post head injury.

4 **Conclusions:** Development of PTH-like pain behaviors following a mild closed head injury, and  
5 responsiveness to treatment in rats is sexually dimorphic. When compared to males, female rats  
6 display a prolonged state of cephalic hyperalgesia, increased responsiveness to a headache  
7 trigger, and a poorer effectiveness of an early and prolonged anti-CGRP treatment. The increased  
8 risk of females to develop PTH may be linked to enhanced responsiveness of peripheral and/or  
9 central pain pathways and a mechanism independent of peripheral CGRP signaling.

10 **Keywords:** Posttraumatic headache, concussion, cutaneous pain hypersensitivity, sumatriptan,  
11 Anti-CGRP monoclonal antibody.

12

13

## 1 **Introduction**

2 Post-traumatic headache (PTH) remains one of the most common and disabling symptoms  
3 following traumatic head injury. Defined as a secondary headache that develops within seven days  
4 of the head trauma (1), PTH often shares similar clinical characteristics with primary headaches,  
5 in particular migraine and tension-type headache (TTH) (2, 3). Currently, there exists no consensus  
6 on how PTH should be treated, primarily due to the poor understanding of its underlying  
7 mechanisms, which can be attributed in part to the paucity of well characterized and clinically  
8 relevant animal models with strong predictive validity. We recently characterized numerous PTH-  
9 like pain behaviors in male rats subjected to a mild closed head injury (mCHI) using a weight drop  
10 device (4). These include the development of acute cephalic allodynia, deficits in spontaneous  
11 exploratory activity and latent sensitization to the headache trigger glyceryl trinitrate (GTN).  
12 Furthermore, these pain behaviors were amenable to acute treatment with sumatriptan as well as  
13 repeated administration of an anti-calcitonin-gene-related peptide monoclonal antibody (Anti-  
14 CGRP mAb) starting immediately after the head injury (4), further strengthening the translational  
15 validity and potential utility of this animal model to study mechanisms of PTH.

16  
17 Current understanding of PTH symptomatology and possible underlying mechanisms, as gleaned  
18 by clinical (3) and preclinical studies (5) are primarily based on findings in male subjects, in part  
19 due to the traditionally perceived idea of greater participation of males in activities with increased  
20 risk of head injuries and related concussions. However, recent clinical data suggest that females,  
21 in particular at adolescent age, have a similar or even higher risk for concussive injuries (6).  
22 Furthermore, females are now thought to have a similar or even increased risk, in particular at  
23 young age, of developing of PTH (7-10).

1  
2 With mounting evidence of sex-differences in pain sensitivity and analgesic responses (11), as  
3 well as migraine-related mechanisms (12-14), the aim of the current study was to extend our  
4 knowledge of the pathophysiology of PTH by investigating potential sex-specific differences in  
5 the development or maintenance of PTH-like pain behaviors in females rats subjected to mCHI.  
6 In addition, we sought to study the relative efficacy of acute sumatriptan treatment as well as of  
7 an early and prolonged treatment with an anti-CGRP mAb.

8

## 9 **Materials & Methods**

### 10 *Animals*

11 All experiments were approved and conducted in compliance with the institutional Animal Care  
12 and Use Committee of the Beth Israel Deaconess Medical Centre, and the ARRIVE (Animal  
13 Research: Reporting of *in vivo* Experiments) guideline (15). Subjects were female rats (Sprague-  
14 Dawley rats, Taconic, USA, 8-9 weeks at the time of arrival). Animals were housed in pairs with  
15 food and water available *ad libitum* under a constant 12-hour light/dark cycle (lights on at 7:00  
16 am) at room temperature. Studies were initialized after a week of acclimatization in the vivarium.  
17 All procedures and testing were conducted during the light phase of the cycle (08:00- 15:00).  
18 Experimental animals were randomly assigned to either sham or mCHI as well as to the different  
19 pharmacological treatment groups.

20

### 21 *Experimental Mild Closed Head Injury (mCHI)*

22 mCHI was induced using the weight-drop device as described previously in male rats (4). Briefly,  
23 rats were anesthetized with 3% isoflurane and placed chest down directly under a weight-drop

1 concussive head trauma device. The device consisted of a hollow cylindrical tube (inner diameter  
2 2.54 cm) placed vertically over the rat's head. Mild closed head injury was induced by dropping a  
3 250 g projectile through the tube from a height of 80 cm, striking the center of the head. To ensure  
4 consistency of the hit location, animals were placed under the weight drop apparatus so that the  
5 weight struck the scalp slightly anterior to the center point between the ears. A foam sponge  
6 (thickness 3.81 cm, density 1.1 g/cm<sup>3</sup>) was placed under the animals to support the head while  
7 allowing some linear anterior-posterior motion without any angular rotational movement at the  
8 moment of impact. A repeated strike was prevented by capturing the weight after the first strike.  
9 All animals regained their righting reflex within 2 min (which likely reflects the recovery from  
10 anesthesia). Immediately after the impact, animals were returned to their home cages for recovery  
11 and were neurologically assessed up to 7 days post-injury for any behavioral abnormalities  
12 suggestive of a major neurological (i.e. motor) impairment. Sham animals were anesthetized for  
13 the same period of time as mCHI animals, but not subjected to the weight drop. There was 0%  
14 mortality after the mCHI procedure with no evidence of skull fractures or cortical bleeding.

15

### 16 *Open field behavior*

17 Activity Monitor (Med Associates, Vermont, USA) was used to assess mCHI-evoked changes in  
18 locomotor activity, exploratory behavior, and anxiety-like behavior in an open field arena (43 x 43  
19 x 30 cm), as previously described (4). The monitoring system records the movement of animals in  
20 the horizontal (X-Y axis) and vertical (Z-axis) planes using 16 infrared beams and detectors,  
21 spaced 2.54 cm apart. Data analyzed included total distance moved, vertical rearing events  
22 (exploratory behavior), and relative time spent in the center of the arena (30 cm X 30 cm) during  
23 a 20 minutes session. The arena was lit with a single white LED bulb on a dimmer switch to

1 maintain a homogenous lighting across the arenas (80 lux). The arena was cleaned with a mild  
2 detergent and dried to remove odor cues between successive rats.

3

#### 4 *Assessment of tactile pain hypersensitivity following mCHI.*

5

6 Behavioral tests were performed during the light phase (08:00-15:00). The method was previously  
7 used by us and others to study PTH- and migraine-related pain behaviors (4, 16-18). Briefly,  
8 animals were placed in a transparent flat-bottomed acrylic holding apparatus (20.4 cm x 8.5 cm).  
9 The apparatus was large enough to enable to the animals to escape the stimulus. Animals were  
10 habituated to the arena for 15 minutes prior to the initial testing. In order to determine if the animals  
11 developed pericranial (cephalic) tactile hypersensitivity, the skin region, including the midline area  
12 above the eyes and 2 cm posterior, was stimulated with different von Frey (VF) filaments (0.6 g–  
13 15 g/force) (18011 Semmes-Weinstein Anesthesiometer kit). Development of hind paw  
14 hypersensitivity was tested by stimulating, using the VF filaments, the mid-dorsal part of the hind  
15 paw. We evaluated changes in withdrawal thresholds, as well as non-reflexive pain responses to  
16 the stimulation using a method previously described in this and other headache models (19-21) by  
17 recording 4 behavioral responses adapted from Vos et al. (22) as follows: 0) *No response*: rat did  
18 not display any response to stimulation 1) *Detection*: rat turned its head towards stimulating object  
19 and latter is explored usually by sniffing; 2) *Withdrawal*: rat turned its head away or pulled it  
20 briskly away from stimulating object (usually followed by scratching or grooming of stimulated  
21 region); 3) *Escape/Attack*: rat turned its body briskly in the holding apparatus in order to escape  
22 stimulation or attacked (biting and grabbing movements) the stimulating object. Starting with the  
23 lowest force, each filament was applied 3 times with an intra-application interval of 5 seconds and  
24 the behavior that was observed at least twice was recorded. For statistical analysis, the score

1 recorded was based on the most aversive behavior noted. The force that elicited two consecutive  
2 withdrawal responses was considered as threshold. To evaluate pain behavior in addition to  
3 changes in threshold, for each rat, at each time point, a cumulative pain score was determined by  
4 combining the individual scores (0–3) for each one of the VF filaments tested. All tests were  
5 conducted and evaluated in a blinded manner.

6

#### 7 *mCHI evoked latent sensitization to GTN*

8 The development of mechanical hyperalgesia in response to systemic administration of a  
9 previously subthreshold dose of the headache trigger glyceryl trinitrate (GTN, 100µg/kg i.p.,  
10 American Reagents, USA) when animals returned to baseline following mCHI was assessed as  
11 described (4, 21). After obtaining pre-GTN baseline cephalic and hind paw VF responses at day  
12 29 post mCHI/sham, animals received GTN on day 30 and were assessed for changes in cephalic  
13 and hind paw mechanical pain thresholds 4 hours later.

#### 14 *Pharmacological treatments*

15 Sumatriptan (Tocris, USA) was freshly dissolved in 0.9% saline and administered intra-peritoneal  
16 (i.p.) at a dose of 1mg/kg in a volume of 1ml/kg. Drug dose and times of administration were based  
17 on the pharmacokinetics of the drugs, studies demonstrating their efficacy in animal and human  
18 models of trigeminal pain (16, 23), and our previous data on PTH-like behaviors following mCHI  
19 in males (4). Anti-CGRP mAb and its corresponding isotype IgG were provided by TEVA  
20 Pharmaceuticals, and formulated in phosphate buffered saline (PBS). mAb and IgG were injected  
21 i.p at a dose of 30 mg/kg, immediately after the head injury and every 6 days subsequently up to  
22 day 30. This dosing regimen has been shown previously to alleviate PTH-like pain behavior (i.e.



1 cephalic allodynia) following mCHI in male rats (4) and pain behaviors in other chronic migraine  
2 models (24).

### 3 *Peripheral blood collection and serum CGRP analysis*

4 At multiple time points (baseline and 72h, Day 7, Day 14 post mCHI) rats were lightly anesthetized  
5 and placed chest down on a heating blanket. The tail was dipped in warm water for 10 seconds in  
6 order to increase vascular flow and swabbed with alcohol. Approximately 300 microliters of blood  
7 was collected from the tail vein using a BD Vacutainer Safety-Lok blood collection needle (Becton  
8 Dickinson, USA) and placed in a microfuge tube containing 10 microliters of protease inhibitor  
9 (Millipore Sigma). Immediately after collection, the blood was placed on ice to coagulate for 30  
10 minutes. Following coagulation, blood was centrifuged at 3000g for 10 min at 4 degrees. The  
11 serum supernatant was transferred to fresh microfuge tubes, snap frozen on dry ice and stored at –  
12 80 degrees Celsius. Serum samples were analysed for CGRP levels via a custom ELISA. Briefly,  
13 a 96-well plate was coated with a mouse anti-CGRP capture antibody (Bertin Bioreagent) and  
14 incubated overnight at 4°C. The coated plate was washed three times with wash buffer (PBS with  
15 0.05% Tween 20) and then blocked using the Sword Blocker SBL-501 reagent (Sword  
16 Diagnostics) for 1 hour at room temperature. After several washes, serum samples and a range of  
17 CGRP standards diluted in Sword Diluent SDI-802 were pipetted into the coated plate with a  
18 human anti-CGRP detection antibody (Teva Pharmaceuticals) and incubated at room temperature  
19 for 2 hours. After washing the plate, captured CGRP analytes were complexed to a HRP-  
20 conjugated mouse anti-human antibody (Southern Biotech) at room temperature for 1 hour.  
21 Following several washes, Sword detector reagents consisting of a substrate/peroxidase mixture  
22 were used according to the manufacturer's instructions. Resonance Raman signals generated using

1 Sword reagents were measured using fluorescence intensity detection at an excitation/emission  
2 wavelength of 530nm/730nm using a BioTek Cytation 5 Microplate Reader.

### 3 **Data analyses**

4 Statistical analyses were conducted using Graph pad prism (version 8.0). All data are presented as  
5 the means  $\pm$  standard error of the mean. Mechanical pain threshold data, obtained using VF  
6 filaments was log-transformed, which is more consistent with a normal distribution (25). To study  
7 time-course changes in open-field behaviour, and responses to mechanical stimuli, data was  
8 analysed using a mixed design ANOVA to determine the effects of time and treatment. Data  
9 included passed the Brown-Forsythe test, indicating equal variance. We used Fisher's LSD post  
10 hoc tests, and correction for multiple comparisons was conducted using the Benjamini and  
11 Hochberg false discovery rate (FDR) controlling procedures (26). Responses to GTN were  
12 assessed using two-tailed paired t-test. The effects of drug treatment on the changes in nociceptive  
13 behaviours were analysed using two-tailed unpaired t-test. Changes in CGRP plasma levels were  
14 tested using one-Way Brown-Forsythe ANOVA test. Significant p and q value were set as 0.05.

## 1 **Results**

### 2 **mCHI-evoked changes in open-field behavior**

3 Previously, we observed that mCHI did not affect the overall distance moved of male rats in an  
4 open field, indicating no gross motor deficits, but led to a reduction in rearing activity suggesting  
5 deficits in exploratory behavior, potentially due to a mild TBI (4, 27, 28). Here, we observed that  
6 females subjected to a similar mCHI protocol also did not exhibit changes in distance moved when  
7 tested up to 14 days post mCHI (Time,  $F_{4,56} = 2.1$ ,  $p = 0.1$ ; Treatment,  $F_{1,14} = 0.4$ ,  $p=0.5$ ; **Figure**  
8 **1(b)**). Similarly, mCHI females also did not exhibit any change in rearing activity (Time,  $F_{4,56} =$   
9  $2.4$ ;  $p = 0.07$ ; Treatment  $F_{1,14} = 0.1$ ,  $p=0.7$ ; **Figure 1(c)**) pointing to the possibility of a milder form  
10 of TBI when compared to males. The lack of a noticeable decrease in exploratory rearing activity,  
11 however, may be due to a lower baseline rearing behavior in our female cohort when compared to  
12 the matching male cohort (females;  $109.5 \pm 8.4$  beam breaks/20 min vs males;  $167.9 \pm 12.1$  beam  
13 breaks/20 min;  $p < 0.001$ , unpaired t-test; not shown). Females subjected to mCHI, however,  
14 displayed reductions in center zone exploration, indicating increased thigmotaxis (Time,  $F_{4,56} =$   
15  $7.9$ ;  $p < 0.0001$ ; Treatment,  $F_{1,14} = 4.63$ ;  $p < 0.05$ ; **Figure 1(d)**). Post-hoc analysis revealed  
16 decreased center zone exploration at 2 and 3 days following mCHI ( $q < 0.01$  for both) suggesting  
17 an acute increase in anxiety-related behaviors, potentially related to mTBI (29, 30). The increased  
18 thigmotaxis response in females was likely a specific sex-dependent response to the mCHI given  
19 that males and females exhibited similar pre-mCHI baseline values ( $29.1 \pm 4.2\%$  of time spent in  
20 center vs  $32.3 \pm 2.5\%$  of time spent in center;  $p = 0.52$ , unpaired t-test, not shown).

21

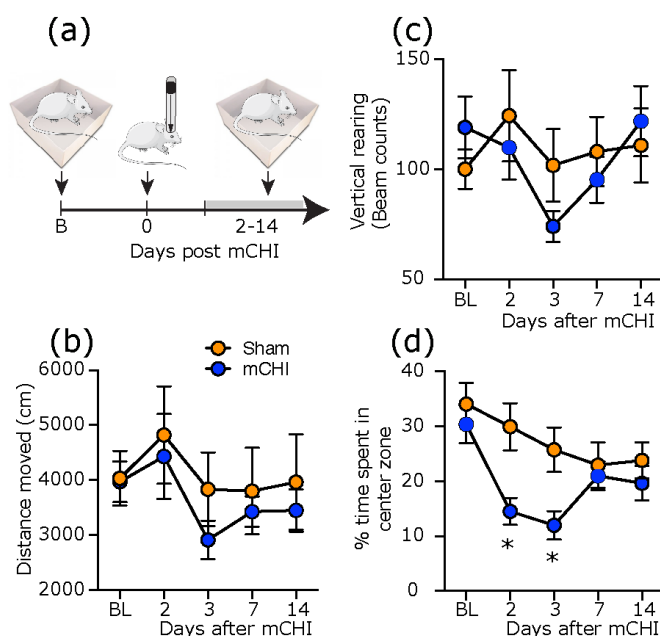

1  
2 **Figure 1:** Changes in open field behaviors in females following mCHI. (a) Scheme of the  
3 experimental design. Rats were subjected to a baseline open-field testing, following by mCHI, and  
4 additional testing 2-14 days later. (b) Changes in distance moved, (c) exploratory vertical rearing,  
5 and (d) % time spent zone. Two-way repeated measures ANOVA, followed by post-hoc test  
6 between mCHI and sham animals indicate an acute decrease in time spent in center zone (and  
7 increased thigmotaxis) at 2 and 3 days following mCHI with no changes in other open-field  
8 parameters. Data are mean and SEM (n=8). \*  $q < 0.05$  (FDR-corrected values after Fisher's least  
9 significant difference post-hoc test at selected time points vs similar time points in sham control  
10 animals). FDR, false discovery rate; mCHI, mild closed-head injury.

## 11 12 **Development of mechanical pain hypersensitivity following mCHI**

13 Male rats subjected to mCHI develop cephalic mechanical hypersensitivity that resolves by day  
14 14 post mCHI. Here, we observed that females subjected to a similar mCHI protocol, also exhibited  
15 decreased cephalic mechanical thresholds when compared to sham animals (Time,  $F_{6,129} = 15.3$ ,  $p$   
16  $< 0.001$ ; Treatment:  $F_{1,27} = 25.8$ ,  $p < 0.001$ ; **Figure 2(b)**). The duration of this allodynic response  
17 was, however, longer than we previously observed in males, and was resolved only by day 29 post  
18 mCHI. Females subjected to mCHI also exhibited an increase in pain score in response to cephalic  
19 mechanical stimulation (Time:  $F_{6,131} = 10.3$ ,  $p < 0.0001$ ; Treatment:  $F_{1,27} = 9.3$ ,  $p < 0.001$ ; **Figure 2**  
20 **(C)**); this hyperalgesic behavior, however was shorter lasting and resolved by day 14 post mCHI.

1 As in males, the development of cephalic pain hypersensitivity was not accompanied by  
2 extracephalic changes throughout the 29 days observation period (threshold,  $F_{6,137} = 8.8$ ,  $p < 0.001$   
3 for time;  $F_{1,27} = 1.4$ ,  $p = 0.25$  for treatment; pain score,  $F_{6,137} = 9.5$ ,  $p < 0.001$  for time;  $F_{1,27} = 1.4$ ,  $p$   
4  $= 0.24$  for treatment, **Figures 2(d and e)**).

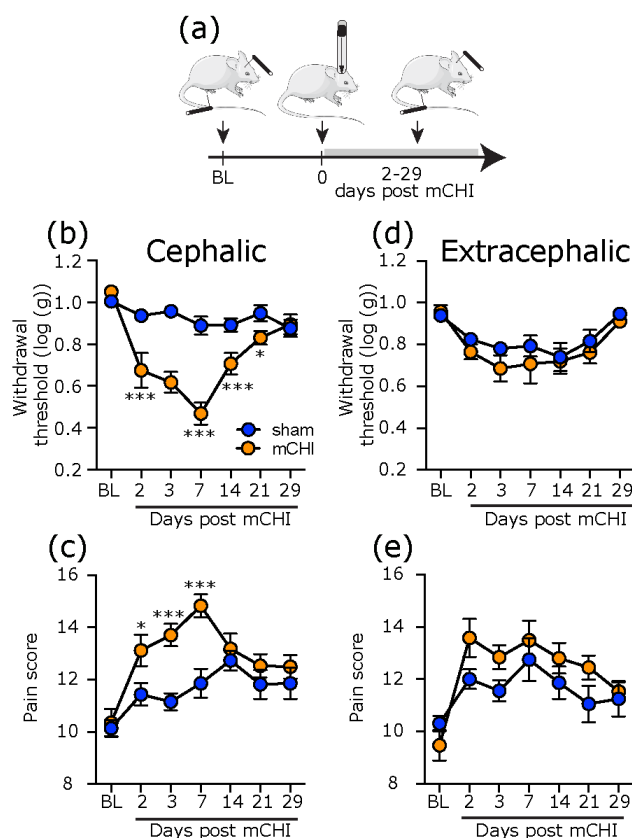

5  
6 **Figure 2:** Development of prolonged cephalic cutaneous mechanical hypersensitivity in females  
7 following mCHI. (a) Schematic of experimental design. Rats underwent baseline von Frey testing  
8 of mechanical pain sensitivity at the cephalic and extracephalic (hind paw) regions, followed by  
9 mCHI, and further nociceptive testing at these locations 2-29 days later. Time course changes in  
10 cephalic (b) and extracephalic (d) mechanical pain withdrawal thresholds and corresponding  
11 cumulative pain scores at the cephalic (c) and extracephalic (e) regions. Two-way repeated  
12 measures ANOVA, followed by post-hoc test between mCHI and sham animals indicate a  
13 prolonged decrease in withdrawal thresholds and increase in pain score following mCHI at the  
14 cephalic region, but no extracephalic changes. Sham: n=12; mCHI: n=17. \*  $q < 0.05$ , \*\*\*  $q < 0.001$   
15 (FDR-corrected values after Fisher's least significant difference post-hoc test at selected time  
16 points vs similar time points in sham control animals).

17  
18

19

## 1 mCHI-evoked prolonged latent cephalic and extracephalic sensitization to GTN

2 Male rats subjected to mCHI exhibit latent sensitization manifested as a cephalic hyperalgesic  
3 response to a subthreshold dose of the headache trigger GTN, after the recovery from the acute  
4 hyperalgesic phase (4). Here, we observed latent sensitization in females that was similar with  
5 regard to the cephalic response, but also involved the extracephalic region. When compared to  
6 baseline values obtained on day 29 post mCHI, administration of GTN on day 30 resulted in  
7 cephalic mechanical hypersensitivity ( $p < 0.001$ , for thresholds and pain scores, **Figures 3(b and**  
8 **c)**), an effect that was not observed in sham animals. Similarly, GTN-evoked hind paw  
9 hypersensitivity in mCHI females ( $p < 0.001$ , for both threshold and pain score (**Figures 3(d, and**  
10 **e)**), but not in females subjected to a sham procedure.

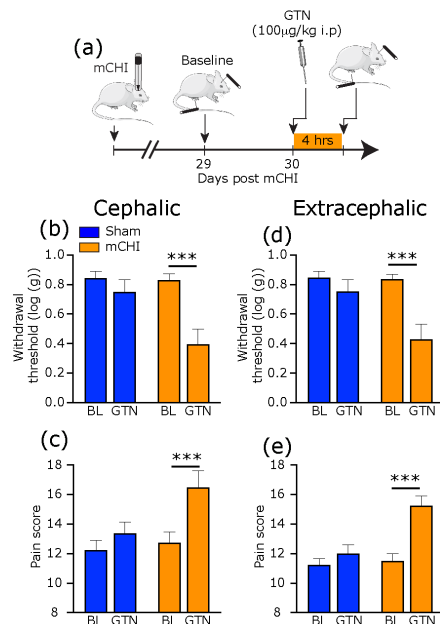

11  
12 **Figure 3:** Cephalic and extracephalic sensitization to GTN following in females 30 days following  
13 mCHI. (a) Scheme of the latent sensitization experimental design. mCHI rats were subjected to  
14 baseline behavioral testing at the cephalic and extracephalic regions on day 29 after mCHI (pre-  
15 GTN baseline), and then a day later (day 30), 4 hours after systemic administration of subthreshold  
16 dose of GTN. Summary of the cephalic withdrawal thresholds (b) and pain scores (c) in sham and  
17 mCHI animals at baseline and following GTN treatment. GTN-evoked extracephalic changes are  
18 illustrated in (d) and (e). GTN evoked significant mechanical pain hypersensitivity at both regions  
19 tested. Bar data are means $\pm$ SEM, Sham; n=8; mCHI: n=8; \*\*\*  $p < 0.001$ , two-tailed paired t-test.

1 **Acute sumatriptan treatment ameliorates mCHI-induced cephalic hypersensitivity, and**  
2 **GTN-evoked cephalic and extracephalic hypersensitivity**  
3 In males, acute treatment with sumatriptan alleviates the cephalic mechanical hypersensitivity  
4 following mCHI, and the cephalic pain hypersensitivity in response to GTN (4). Here, we found  
5 that acute sumatriptan treatment in females, at 7 days post-mCHI, exerted a similar anti-  
6 hyperalgesic effect by decreasing the cephalic pain threshold ( $p < 0.001$ , **Figure 4(b)**), as well as  
7 the associated pain response ( $p < 0.01$ , **Figure 4(c)**). Acute sumatriptan treatment was also effective  
8 at inhibiting the GTN-evoked decrease in cephalic mechanical pain threshold and increased pain  
9 score ( $p < 0.001$ ,  $p < 0.05$  respectively, **Figures 5(b and c)**). Sumatriptan was also able to inhibit the  
10 GTN-evoked decrease in hind paw mechanical pain threshold, and increased pain score ( $p < 0.001$ ,  
11  $p < 0.001$ , **Figure 5 (d and e)**).

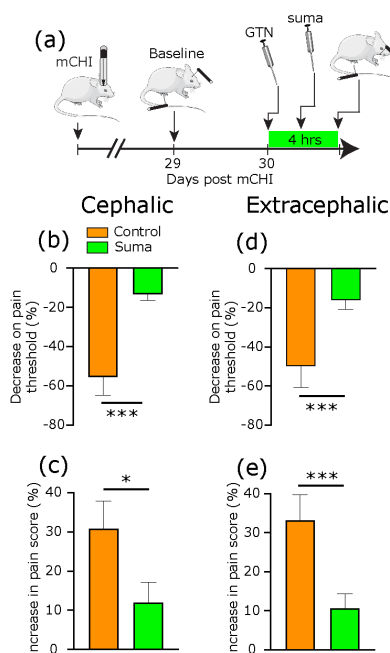

12  
13 **Figure 4:** Acute sumatriptan treatment exert an anti-hyperalgesic effect in mCHI females. (a)  
14 Schematic of experimental design. Rats underwent baseline von Frey testing of cephalic  
15 mechanical pain sensitivity, followed by mCHI. On day 7 post mCHI, animals were treated with  
16 sumatriptan or vehicle, and then subjected to nociceptive testing 2 hours later. Summary of  
17 sumatriptan-related changes in withdrawal thresholds (b) and related pain scores (c). Bar data are  
18 means $\pm$ SEM, Control; n=10; Suma n=10, \*\*\*  $p < 0.001$ , unpaired t-test.

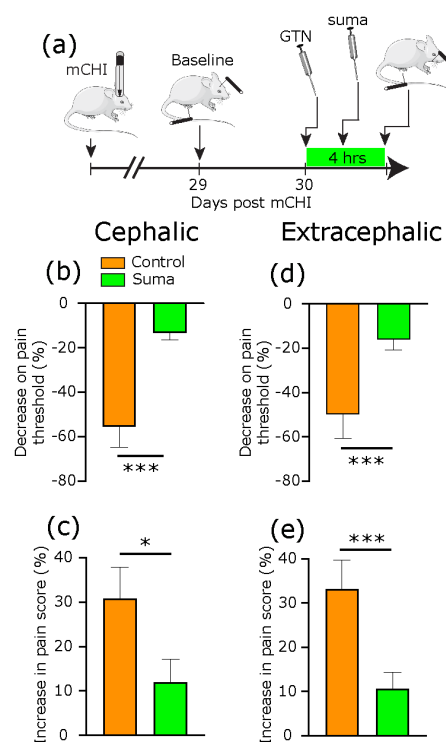

1  
2 **Figure 5:** Acute sumatriptan treatment exerts an anti-hyperalgesic effect on GTN-evoked cephalic  
3 and extracephalic mechanical pain hypersensitivity in mCHI females. (a) Schematic of  
4 experimental design. mCHI rats were subjected to baseline behavioral testing at the cephalic and  
5 extracephalic regions on day 29 after mCHI (pre-GTN baseline), and then a day later (day 30).  
6 Sumatriptan was administered 1 hour prior to systemic administration of subthreshold dose of  
7 GTN followed by von Frey testing 4 hours later. Summary of GTN-evoked changes in cephalic  
8 withdrawal thresholds (b) and related pain scores (c). Summary of GTN-evoked changes at the  
9 extracephalic site. Means±SEM, Control: n=8; Suma: n=9; \*\*\* p<0.001; \* p<0.05; unpaired t-test.

10  
11 **Early and repeated administration of anti-CGRP mAb does not prevent mCHI-induced**  
12 **cephalic mechanical hypersensitivity, but partially inhibits GTN-evoked pain**  
13 **hypersensitivity in female rats.**

14 In males, repeated administration of anti-CGRP mAb, starting immediately following the mCHI,  
15 inhibits the cephalic hypersensitivity and the prolonged latent cephalic sensitization to GTN (4).  
16 Here, in contrast, when compared to treatment with a control IgG, similar administration of the  
17 anti-CGRP mAb in females did not block the decrease in cephalic pain threshold (Time,  $F_{3,90} =$   
18 17.1,  $p < 0.0001$ ; Treatment:  $F_{1,30} = 0.1$ ,  $p = 0.7$ , **Figure 6(b)**), or the associated increase in pain



1 score (Time,  $F_{3,90} = 41.5$ ,  $p < 0.0001$ ; Treatment:  $F_{1,30} = 0.7$ ,  $p = 0.42$ , **Figure 6(c)**). Anti-CGRP  
2 treatment was also less effective in inhibiting the hyperalgesic response to GTN at 30 days  
3 following mCHI. When compared to treatment with the control IgG, anti-CGRP mAb inhibited  
4 the GTN-evoked decrease in cephalic thresholds ( $p < 0.05$ , **Figure 7(b)**), but not the associated  
5 increase in pain score ( $p = 0.23$ , **Figure 7(c)**). Treatment with the anti-CGRP mAb was also  
6 ineffective in inhibiting the GTN-evoked hind paw hypersensitivity, when compared to IgG ( $p =$   
7  $0.1$  for threshold changes;  $p = 0.36$  for pain score changes, **Figures 7(d and e)**).

8

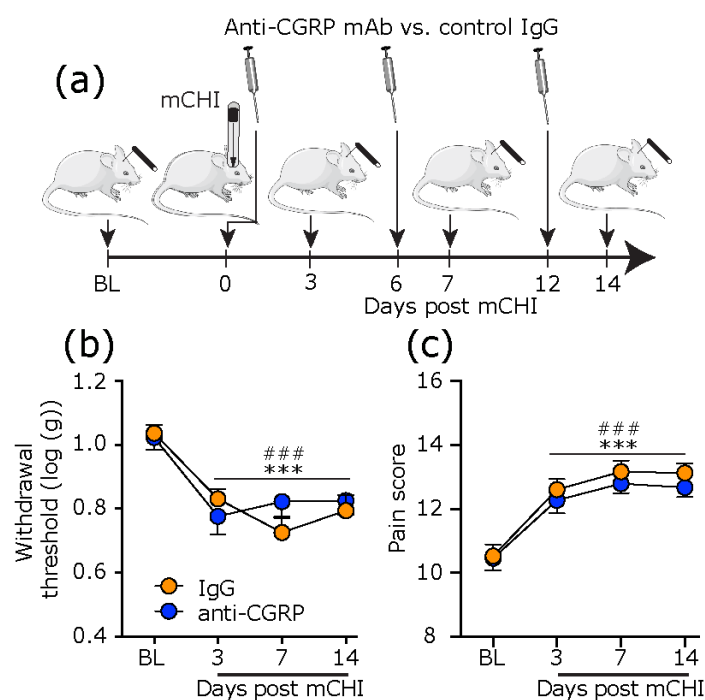

9

10 **Figure 6:** Treatment with anti-CGRP mAb does not affect the development of cephalic pain  
11 hypersensitivity in mCHI females. Schematic of experimental design. Rats underwent baseline  
12 von Frey testing of cephalic mechanical pain sensitivity, followed by mCHI. Anti-CGRP mAb or  
13 a control IgG were administered immediately after the mCHI and then every 6 days. Two-way  
14 repeated measures ANOVA between anti-CGRP and IgG treatments revealed no effect of  
15 treatment on the decrease in cephalic withdrawal threshold (b), or the increase in pain score (c).  
16 Means $\pm$ SEM, Anti-CGRP:  $n=16$ ; control IgG:  $n=16$ ; \*\*\*  $q < 0.001$ ; ###  $q < 0.001$  (FDR-corrected  
17 values after Fisher's least significant difference post-hoc test at 3-14 days post mCHI vs baseline  
18 for anti-CGRP and IgG respectively).

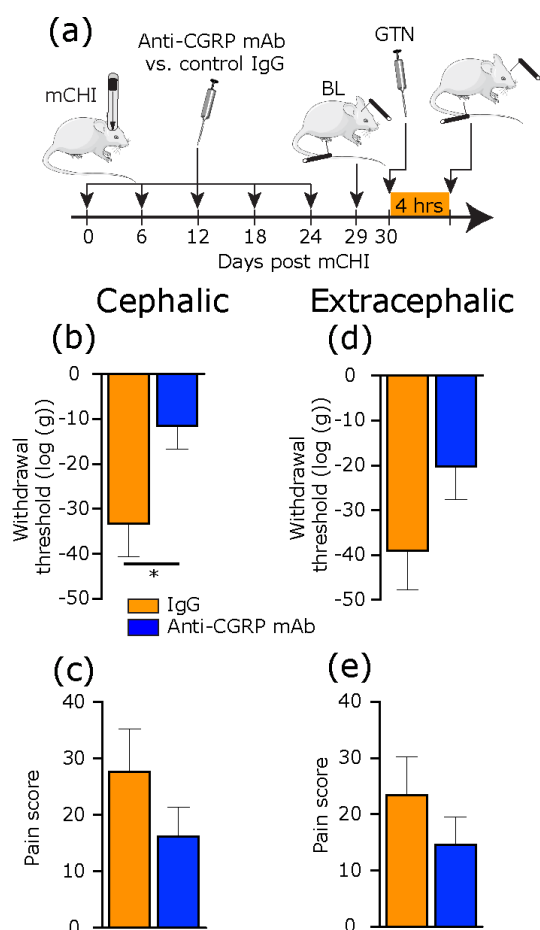

1  
2 **Figure 7:** Treatment with anti-CGRP mAb partially inhibits latent sensitization to GTN in mCHI  
3 females. (a) Schematic of experimental design. mCHI rats received treatment with anti-CGRP  
4 mAb or a control IgG immediately after the mCHI and then every 6 days. GTN-evoked cephalic  
5 and extracephalic mechanical pain hypersensitivity was assessed at days 29 (baseline) and day  
6 30 (GTN administration). Summary of the GTN-evoked changes in cephalic withdrawal  
7 thresholds (b) and pain scores (c). GTN-evoked extracephalic changes are illustrated in (d) and  
8 (e). Means±SEM, Anti-CGRP: n=12; IgG: n=12; \* p<0.05 unpaired t-test.

9  
10 **mCHI in female leads to transient increase in serum CGRP levels.**

11 Having found a lack of inhibitory effect of the anti-CGRP mAb on the mCHI-evoked pain  
12 hypersensitivity and a partial effect on the latent sensitization to GTN in females, we examined  
13 serum CGRP levels in females at baseline and up to 14 days following mCHI. Overall, we found  
14 time-related increases in the CGRP serum levels following mCHI ( $W_{3,18.9} = 4.5$ ,  $p < 0.01$ ). Post-  
15 hoc analyses revealed an increase in CGRP serum levels only at day 7 ( $q < 0.001$ , **Figure 8(b)**).

1 We also examined serum CGRP levels in male rats, in which treatment with anti-CGRP mAb  
2 produced an anti-hyperalgesic effect following mCHI (4). However, we did not detect any time-  
3 course changes in serum CGRP levels for up to 14 days following mCHI ( $W_{3,15.9} = 0.83$ ,  $p =$   
4  $0.49$ ).

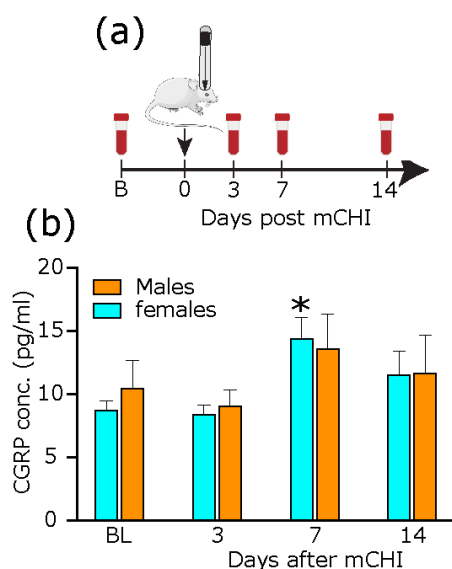

5  
6 **Figure 8: Sex-related changes in serum CGRP levels following mCHI.** (a) Schematic of  
7 experimental design. Serum CGRP levels were assessed in blood samples collected at baseline,  
8 and 3,7, and 14 days post mCHI. (b) Summary of the Serum CGRP levels in females and males.  
9 Data are Means $\pm$ SEM, number of animals at each time point are in parentheses; \*  $q < 0.05$  (FDR-  
10 corrected values after Fisher's least significant difference post-hoc test of mCHI vs baseline).  
11

## 12 Discussion

13 Building upon our previous work in male rats subjected to mCHI (4), the present study aimed to  
14 characterize changes in open-field behavior, and PTH-like pain behaviors following a similar  
15 traumatic head injury protocol in female rats. Our data point to key sex differences, including,  
16 enhanced pain responses, an acute increase in anxiety-like behavior, and decreased responsiveness  
17 to anti-CGRP mAb treatment in females.  
18

1 A key sensory change identified in male subjects suffering from PTH (31), and in male rats  
2 subjected to mCHI (4) is the presence of cutaneous cephalic mechanical pain hypersensitivity. The  
3 development of cephalic mechanical allodynia is thought to reflect the sensitization of trigeminal  
4 pain pathways, a process that contributes to the pain in other types of headache, in particular  
5 migraine (32). Our current data suggests that mCHI in females leads to an enhanced cephalic  
6 hyperalgesic response, in particular a much longer duration, when compared to males subjected to  
7 a similar head injury protocol. Female sex has been suggested as a key positive predictor for  
8 development of PTH (33-35), and has been attributed to their higher prevalence of pre-existing  
9 headache and migraine (33, 34). Given that our rats did not encounter any potential headache  
10 producing event prior to the mCHI, our findings rather point to other/additional mechanisms,  
11 potentially related to increased nociceptive processing at the level of the peripheral and/or the  
12 central nervous system in females (14, 36-38), in particular facilitation of the process underlying  
13 the development of trigeminal central sensitization in response to head trauma.

14  
15 Another key finding of the current study was the inability of an early and sustained anti-CGRP  
16 mAb treatment to ameliorate the prolonged cephalic mechanical hypersensitivity post-mCHI in  
17 females, in contrast to what we previously observed in males (4). Of importance, was the lack of  
18 the anti-hyperalgesic effect of the anti-CGRP mAb was despite the elevation of serum CGRP  
19 levels post-mCHI, and strongly suggests that the mCHI-evoked cephalic hypersensitivity in  
20 females may not involve peripheral CGRP signaling. It is noteworthy that we did not detect a  
21 similar increase in serum CGRP levels in males subjected to mCHI , which is in agreement with a  
22 previous study that employed a similar mCHI approach (39). The inconsistency between the  
23 effectiveness of anti-CGRP mAb treatment in this model and the changes in serum CGRP levels

1 suggests that the latter may be a poor indicator of peripheral CGRP involvement in mediating a  
2 headache-like behavior. Our current finding that acute sumatriptan treatment was effective in  
3 reducing the cephalic hyperalgesic behavior in mCHI females, as previously reported in males (4),  
4 suggests that its therapeutic mode of action in this model may not involve alteration of the  
5 peripheral CGRP signaling cascade, and is likely to bypass the processes that is influenced by sex  
6 differences, as observed in other rodent models of persistent migraine-like cephalic pain  
7 hypersensitivity (36, 40, 41).

8  
9 In addition to the prolonged cephalic hyperalgesic response in mCHI females, the enhanced pain  
10 response in females was also manifested by the development of latent sensitization to GTN that  
11 involved the cephalic region, as in males, but also an extracephalic hyperalgesic response to GTN,  
12 unlike in males. This increased responsiveness of females to GTN is reminiscent of the greater  
13 delayed extracephalic hyperalgesia observed in females following systemic administration of GTN  
14 at a higher dose, or after peripheral administration of a low dose (41, 42), and may be linked to a  
15 migraine-related mechanism that is influenced by sex differences. In males subjected to mCHI,  
16 the development of latent sensitization to GTN involves an immune-related mechanism, linked  
17 to mast cells (21). The previous findings that mCHI involves the degranulation of meningeal  
18 mast cells (43) and that meningeal mast cell density in females is higher than in males (13),  
19 points to the possibility that meningeal mast cells may play a role in the enhanced nociceptive  
20 response in females following mCHI, and particularly the prolonged latent sensitization.

21 Our finding in females that early and prolonged treatment with the anti-CGRP mAb was only  
22 partially effective in ameliorating the latent cephalic sensitization, unlike in males, suggests that  
23 this process may not be fully dependent on peripheral CGRP signaling, and that it is also under the

1 influence of a sex-dependent mechanism. It is noteworthy that the lack or incomplete anti-  
2 hyperalgesic effect of anti-CGRP mAb treatment in females in this PTH model is in contrast to  
3 previous studies of migraine-related behaviors linked to peripheral CGRP signaling, which  
4 reported either lack of sex differences (44, 45), or female specific pro-nociceptive effects (14).  
5 Taken together, our data points to a potential differential role for peripheral CGRP signaling in the  
6 pathophysiology of PTH and migraine at least in females. The possibility that enhanced and  
7 persistent secretion of CGRP from injured meningeal afferent endings that innervate the  
8 subarachnoid space (i.e. leptomeningeal afferents), and which could not be targeted by peripherally  
9 administered mAb, plays a key role in PTH in females should also be considered.

10

11 The finding that sumatriptan treatment was effective in blocking the GTN-evoked extracephalic  
12 hypersensitivity, while anti-CGRP mAb was completely ineffective, points to the possibility that  
13 a central, rather than peripheral nociceptive process is involved in mediating PTH females.  
14 However, sumatriptan may also act peripherally, potentially via a vascular mechanism, to inhibit  
15 the GTN-evoked hyperalgesic response (42). Head trauma and associated brain injury give rise to  
16 peripheral changes, including altered immune response (46), and additional studies will be  
17 required to determine the relative contribution of mCHI-evoked peripheral vs central changes that  
18 mediate the enhanced extracephalic response to GTN.

19

20 A potential contributing factor to the enhanced response of females in this head trauma model is  
21 their relative smaller size when compared to males at the time of injury. At present we cannot  
22 exclude the possibility that the extended duration of the hyperalgesic response and enhanced  
23 hyperalgesic responsiveness to GTN we observed in females involved a greater intracranial

1 damage with extended brain injury. However, the lack of changes in open field activity, including  
2 exploratory behavior, which agrees with other TBI-related behaviors noted in similar models of  
3 head trauma (47) argues against such a possibility. The development of acute anxiety-like behavior  
4 (i.e. thigmotaxis) in females, which was not detected previously in mCHI males, could possibly  
5 point to an enhanced secondary condition of brain injury (47). However, since increased  
6 thigmotaxis is also observed in other pain models (48-50), it may also signify the interdependent  
7 relationship between pain and anxiety. The present study did not monitor the estrous cycle or  
8 related hormonal changes, which may have influenced the data. However, the variability noted in  
9 the post mCHI data in females was reminiscent of that observed in our previous male study, and  
10 is in agreement with finding from a large data set of physiological, and behavioral measures (51),  
11 suggesting that estrous cycle-related changes in the levels of circulating hormones in females may  
12 not play a large role in this model.

13

#### 14 **Conclusions:**

15 The current study provides preclinical data supporting the notion of sex differences in the  
16 mechanisms underlying the development of posttraumatic headache. The data indicates that  
17 females develop posttraumatic cephalic pain hypersensitivity for a longer duration, as well as  
18 extended latent hypersensitivity to the headache trigger GTN. In addition, our data suggests that  
19 the acute PTH-like pain symptoms in females are CGRP-independent, and that the latent  
20 sensitization to GTN involves CGRP signaling to a much lesser extent than in males. The observed  
21 sex difference in pain response and CGRP involvement may have implication for the mechanisms  
22 that link female sex to the increased propensity to develop PTH, and potentially its therapeutic  
23 approaches.

## 1 **References**

- 2 1. (IHS) HCCotIHS. The International Classification of Headache Disorders. *Cephalalgia*.  
3 2018;38(3rd edition):1-211.
- 4 2. Lew HL, Lin PH, Fuh JL, Wang SJ, Clark DJ, Walker WC. Characteristics and treatment  
5 of headache after traumatic brain injury: a focused review. *Am J Phys Med Rehabil*.  
6 2006;85(7):619-27.
- 7 3. Lucas S, Ahn AH. Posttraumatic Headache: Classification by Symptom-Based Clinical  
8 Profiles. *Headache*. 2018;58(6):873-82.
- 9 4. Bree D, Levy D. Development of CGRP-dependent pain and headache related behaviours  
10 in a rat model of concussion: Implications for mechanisms of post-traumatic headache.  
11 *Cephalalgia*. 2018;38(2):246-58.
- 12 5. Bree D, Levy D. Strides Toward Better Understanding of Post-Traumatic Headache  
13 Pathophysiology Using Animal Models. *Current pain and headache reports*. 2018;22(10):67.
- 14 6. Spani CB, Braun DJ, Van Eldik LJ. Sex-related responses after traumatic brain injury:  
15 Considerations for preclinical modeling. *Front Neuroendocrinol*. 2018.
- 16 7. Jensen OK, Thulstrup AM. [Gender differences of post-traumatic headache and other  
17 post-commotio symptoms. A follow-up study after a period of 9-12 months]. *Ugeskr Laeger*.  
18 2001;163(37):5029-33.
- 19 8. Lucas S. Posttraumatic Headache: Clinical Characterization and Management. *Current*  
20 *pain and headache reports*. 2015;19(10):520.
- 21 9. Colantonio A, Harris JE, Ratcliff G, Chase S, Ellis K. Gender differences in self reported  
22 long term outcomes following moderate to severe traumatic brain injury. *BMC Neurol*.  
23 2010;10:102.
- 24 10. Blume HK, Vavilala MS, Jaffe KM, Koepsell TD, Wang J, Temkin N, et al. Headache  
25 after pediatric traumatic brain injury: a cohort study. *Pediatrics*. 2012;129(1):e31-9.
- 26 11. Bartley EJ, Fillingim RB. Sex differences in pain: a brief review of clinical and  
27 experimental findings. *Br J Anaesth*. 2013;111(1):52-8.
- 28 12. Scheff NN, Gold MS. Sex differences in the inflammatory mediator-induced sensitization  
29 of dural afferents. *J Neurophysiol*. 2011;106(4):1662-8.
- 30 13. Boes T, Levy D. Influence of sex, estrous cycle, and estrogen on intracranial dural mast  
31 cells. *Cephalalgia*. 2012;32(12):924-31.
- 32 14. Avona A, Burgos-Vega C, Burton MD, Akopian A, Price TJ, Dussor G. Dural calcitonin  
33 gene-related peptide produces female-specific responses in rodent migraine models. *J Neurosci*.  
34 2019.
- 35 15. Kilkenny C, Browne WJ, Cuthi I, Emerson M, Altman DG. Improving bioscience  
36 research reporting: the ARRIVE guidelines for reporting animal research. *Vet Clin Pathol*.  
37 2012;41(1):27-31.
- 38 16. Oshinsky ML, Gomonchareonsiri S. Episodic dural stimulation in awake rats: a model for  
39 recurrent headache. *Headache*. 2007;47(7):1026-36.
- 40 17. Yan J, Melemedjian OK, Price TJ, Dussor G. Sensitization of dural afferents underlies  
41 migraine-related behavior following meningeal application of interleukin-6 (IL-6). *Molecular*  
42 *pain*. 2012;8:6.
- 43 18. Edelmayer RM, Le LN, Yan J, Wei X, Nassini R, Materazzi S, et al. Activation of  
44 TRPA1 on dural afferents: a potential mechanism of headache pain. *Pain*. 2012;153(9):1949-58.



- 1 19. Levy D, Kainz V, Burstein R, Strassman AM. Mast cell degranulation distinctly activates  
2 trigemino-cervical and lumbosacral pain pathways and elicits widespread tactile pain  
3 hypersensitivity. *Brain Behav Immun*. 2012;26(2):311-7.
- 4 20. Zhao J, Levy D. The sensory innervation of the calvarial periosteum is nociceptive and  
5 contributes to headache-like behavior. *Pain*. 2014;155(7):1392-400.
- 6 21. Bree D, Levy D. Intact mast cell content during mild head injury is required for  
7 development of latent pain sensitization: implications for mechanisms underlying post-traumatic  
8 headache. *Pain*. 2019;160(5):1050-8.
- 9 22. Vos BP, Strassman AM, Maciewicz RJ. Behavioral evidence of trigeminal neuropathic  
10 pain following chronic constriction injury to the rat's infraorbital nerve. *J Neurosci*. 1994;14(5 Pt  
11 1):2708-23.
- 12 23. Winner P, Mannix LK, Putnam DG, McNeal S, Kwong J, O'Quinn S, et al. Pain-free  
13 results with sumatriptan taken at the first sign of migraine pain: 2 randomized, double-blind,  
14 placebo-controlled studies. *Mayo Clin Proc*. 2003;78(10):1214-22.
- 15 24. Kopruszinski CM, Xie JY, Eyde NM, Remeniuk B, Walter S, Stratton J, et al. Prevention  
16 of stress- or nitric oxide donor-induced medication overuse headache by a calcitonin gene-related  
17 peptide antibody in rodents. *Cephalalgia*. 2016.
- 18 25. Mills C, Leblond D, Joshi S, Zhu C, Hsieh G, Jacobson P, et al. Estimating efficacy and  
19 drug ED50's using von Frey thresholds: impact of weber's law and log transformation. *J Pain*.  
20 2012;13(6):519-23.
- 21 26. Benjamini Y, Hochberg Y. Controlling the False Discovery Rate: A Practical and  
22 Powerful Approach to Multiple Testing. *Journal of the Royal Statistical Society Series B*.  
23 1995;57(1):289-300.
- 24 27. Herrera JJ, Bockhorst K, Kondraganti S, Stertz L, Quevedo J, Narayana PA. Acute White  
25 Matter Tract Damage after Frontal Mild Traumatic Brain Injury. *Journal of neurotrauma*.  
26 2017;34(2):291-9.
- 27 28. Kilbourne M, Kuehn R, Tosun C, Caridi J, Keledjian K, Bochicchio G, et al. Novel  
28 model of frontal impact closed head injury in the rat. *Journal of neurotrauma*. 2009;26(12):2233-  
29 43.
- 30 29. Wagner AK, Postal BA, Darrah SD, Chen X, Khan AS. Deficits in novelty exploration  
31 after controlled cortical impact. *Journal of neurotrauma*. 2007;24(8):1308-20.
- 32 30. Tucker LB, Burke JF, Fu AH, McCabe JT. Neuropsychiatric Symptom Modeling in Male  
33 and Female C57BL/6J Mice after Experimental Traumatic Brain Injury. *Journal of neurotrauma*.  
34 2017;34(4):890-905.
- 35 31. Defrin R, Gruener H, Schreiber S, Pick CG. Quantitative somatosensory testing of  
36 subjects with chronic post-traumatic headache: implications on its mechanisms. *Eur J Pain*.  
37 2010;14(9):924-31.
- 38 32. Bigal ME, Ashina S, Burstein R, Reed ML, Buse D, Serrano D, et al. Prevalence and  
39 characteristics of allodynia in headache sufferers: a population study. *Neurology*.  
40 2008;70(17):1525-33.
- 41 33. Hoffman JM, Lucas S, Dikmen S, Braden CA, Brown AW, Brunner R, et al. Natural  
42 history of headache after traumatic brain injury. *Journal of neurotrauma*. 2011;28(9):1719-25.
- 43 34. Walker WC, Marwitz JH, Wilk AR, Ketchum JM, Hoffman JM, Brown AW, et al.  
44 Prediction of headache severity (density and functional impact) after traumatic brain injury: A  
45 longitudinal multicenter study. *Cephalalgia*. 2013;33(12):998-1008.

- 1 35. Nordhaug LH, Linde M, Follestad T, Skandsen ON, Bjarko VV, Skandsen T, et al.  
2 Change in Headache Suffering and Predictors of Headache after Mild Traumatic Brain Injury: A  
3 Population-Based, Controlled, Longitudinal Study with Twelve-Month Follow-Up. *Journal of*  
4 *neurotrauma*. 2019.
- 5 36. Ferrari LF, Khomula EV, Araldi D, Levine JD. Marked Sexual Dimorphism in the Role  
6 of the Ryanodine Receptor in a Model of Pain Chronification in the Rat. *Sci Rep*. 2016;6:31221.
- 7 37. Dickie AC, McCormick B, Lukito V, Wilson KL, Torsney C. Inflammatory Pain  
8 Reduces C Fiber Activity-Dependent Slowing in a Sex-Dependent Manner, Amplifying  
9 Nociceptive Input to the Spinal Cord. *J Neurosci*. 2017;37(27):6488-502.
- 10 38. Sannajust S, Imbert I, Eaton V, Henderson T, Liaw L, May M, et al. Females have  
11 greater susceptibility to develop ongoing pain and central sensitization in a rat model of  
12 temporomandibular joint pain. *Pain*. 2019;160(9):2036-49.
- 13 39. Song Y, Bi L, Zhang Z, Huang Z, Hou W, Lu X, et al. Increased levels of calcitonin  
14 gene-related peptide in serum accelerate fracture healing following traumatic brain injury. *Mol*  
15 *Med Rep*. 2012;5(2):432-8.
- 16 40. Munro G, Petersen S, Jansen-Olesen I, Olesen J. A unique inbred rat strain with sustained  
17 cephalic hypersensitivity as a model of chronic migraine-like pain. *Sci Rep*. 2018;8(1):1836.
- 18 41. Pradhan AA, Smith ML, McGuire B, Tarash I, Evans CJ, Charles A. Characterization of  
19 a novel model of chronic migraine. *Pain*. 2014;155(2):269-74.
- 20 42. Ferrari LF, Levine JD, Green PG. Mechanisms mediating nitroglycerin-induced delayed-  
21 onset hyperalgesia in the rat. *Neuroscience*. 2016;317:121-9.
- 22 43. Levy D, Edut S, Baraz-Goldstein R, Rubovitch V, Defrin R, Bree D, et al. Responses of  
23 dural mast cells in concussive and blast models of mild traumatic brain injury in mice: Potential  
24 implications for post-traumatic headache. *Cephalalgia*. 2016;36(10):915-23.
- 25 44. Rea BJ, Wattiez AS, Waite JS, Castonguay WC, Schmidt CM, Fairbanks AM, et al.  
26 Peripherally administered calcitonin gene-related peptide induces spontaneous pain in mice:  
27 implications for migraine. *Pain*. 2018;159(11):2306-17.
- 28 45. Mason BN, Kaiser EA, Kuburas A, Loomis MM, Latham JA, Garcia-Martinez LF, et al.  
29 Induction of Migraine-Like Photophobic Behavior in Mice by Both Peripheral and Central  
30 CGRP Mechanisms. *J Neurosci*. 2017;37(1):204-16.
- 31 46. Ritzel RM, Doran SJ, Barrett JP, Henry RJ, Ma EL, Faden AI, et al. Chronic Alterations  
32 in Systemic Immune Function after Traumatic Brain Injury. *Journal of neurotrauma*.  
33 2018;35(13):1419-36.
- 34 47. Mychasiuk R, Hehar H, Candy S, Ma I, Esser MJ. The direction of the acceleration and  
35 rotational forces associated with mild traumatic brain injury in rodents effect behavioural and  
36 molecular outcomes. *J Neurosci Methods*. 2016;257:168-78.
- 37 48. Gregoire S, Michaud V, Chapuy E, Eschalier A, Ardid D. Study of emotional and  
38 cognitive impairments in mononeuropathic rats: effect of duloxetine and gabapentin. *Pain*.  
39 2012;153(8):1657-63.
- 40 49. Sang K, Bao C, Xin Y, Hu S, Gao X, Wang Y, et al. Plastic change of prefrontal cortex  
41 mediates anxiety-like behaviors associated with chronic pain in neuropathic rats. *Molecular pain*.  
42 2018;14:1744806918783931.
- 43 50. Parent AJ, Beaudet N, Beaudry H, Bergeron J, Berube P, Drolet G, et al. Increased  
44 anxiety-like behaviors in rats experiencing chronic inflammatory pain. *Behav Brain Res*.  
45 2012;229(1):160-7.

- 1 51. Shansky RM. Are hormones a "female problem" for animal research? *Science*.
- 2 2019;364(6443):825-6.
